# Supplementary material for: Degradation and mechanism analysis of chloroxylenol in aqueous solution by gas–liquid discharge plasma combined with ozonation
Source: Royal Society of Chemistry journal article supplement (doi:10.1039/d1ra01886h), 2021-01-01
Supplement: d1ra01886h1.pdf [file d1ra01886h1.pdf]

## Supplementary Material

### **Degradation and mechanism analysis of chloroxylenol in aqueous solution by gas-liquid discharge plasma combined with ozonation**

Keke Ma<sup>a</sup>, Lu Zhou<sup>\*a</sup>, Yu Bai<sup>a</sup>, Yiying Xin<sup>a</sup>, Mingru Chen<sup>a</sup>, Heping Li<sup>b</sup>, Chengyu Bao<sup>b</sup>, Yuexi Zhou<sup>a,c</sup>

a School of Environment, Tsinghua University, Beijing 100084, P. R. China

b Department of Engineering Physics, Tsinghua University, Beijing 100084, P. R. China

c Research Center of Environmental Pollution Control Engineering Technology, Chinese Research Academy of Environmental Sciences, Beijing 100012, P.R. China

\*Corresponding author:

Dr. Lu Zhou

E-mail: [zhoulu@tsinghua.edu.cn](mailto:zhoulu@tsinghua.edu.cn)

Supporting Figure: 5

Supporting Table: 2

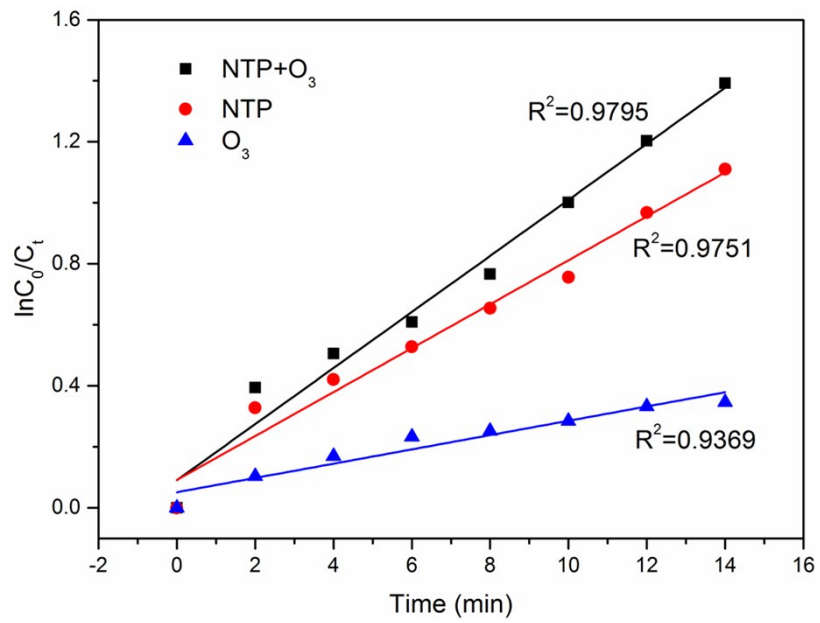

Fig. S1 First-order plots of PXMC degradation as a function of treatment time in three systems.

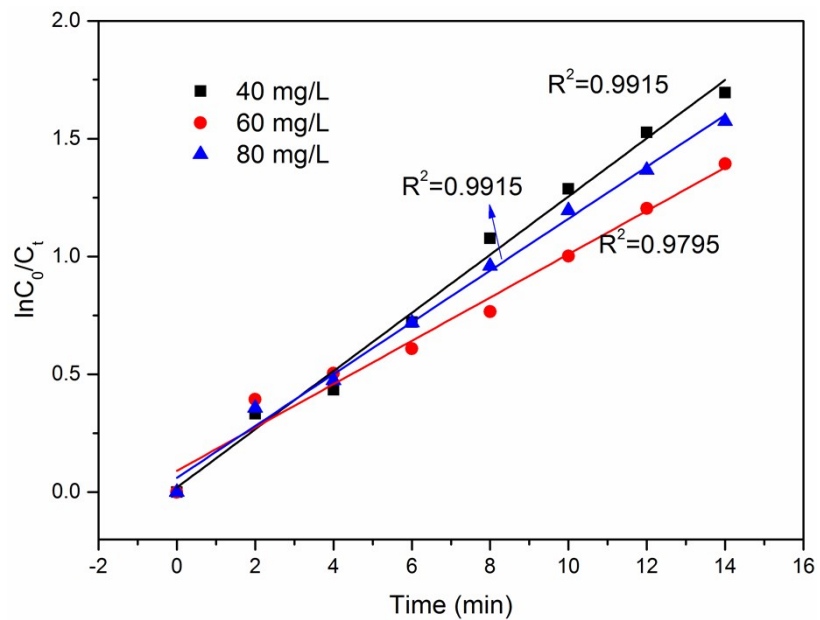

Fig. S2 First-order plots of PXMC degradation as a function of treatment time NTP/O<sub>3</sub> system, for concentrations of 40, 50, 60 and 80 mg/L.

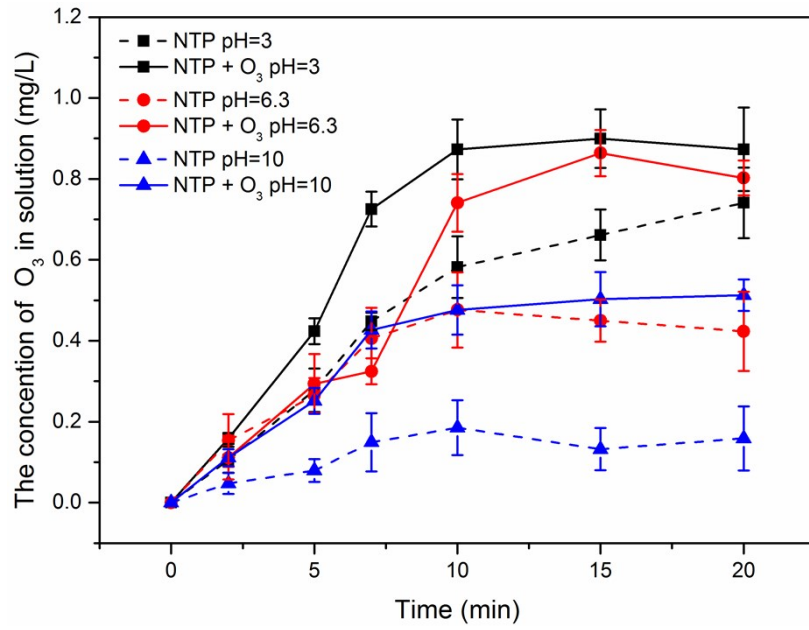

Fig. S3 The concentration of  $O_3$  in solution with different pH in NTP/ $O_3$  and NTP system.

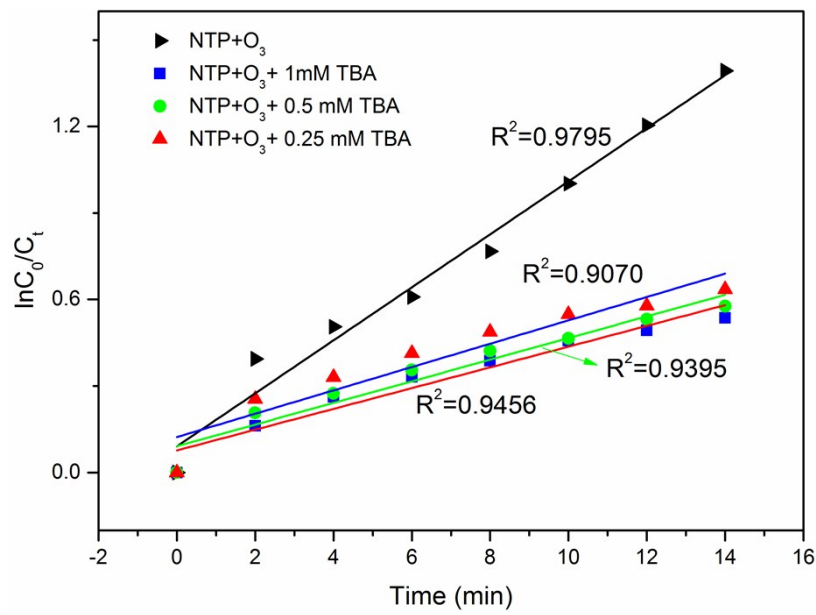

Fig. S4 First-order plots of PXMC degradation as a function of treatment time in NTP/ $O_3$  system with different concentration of radical scavenger

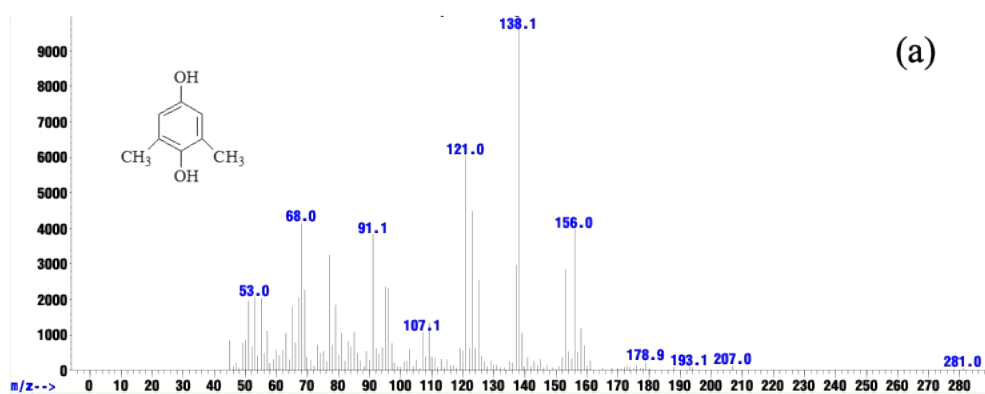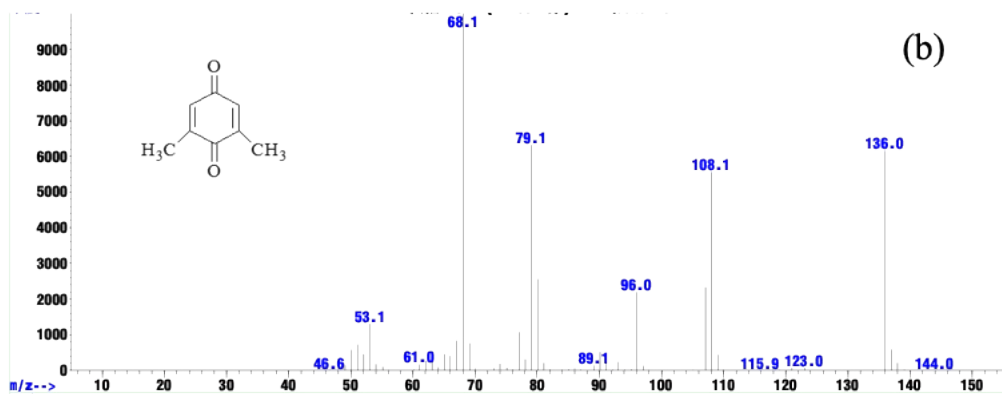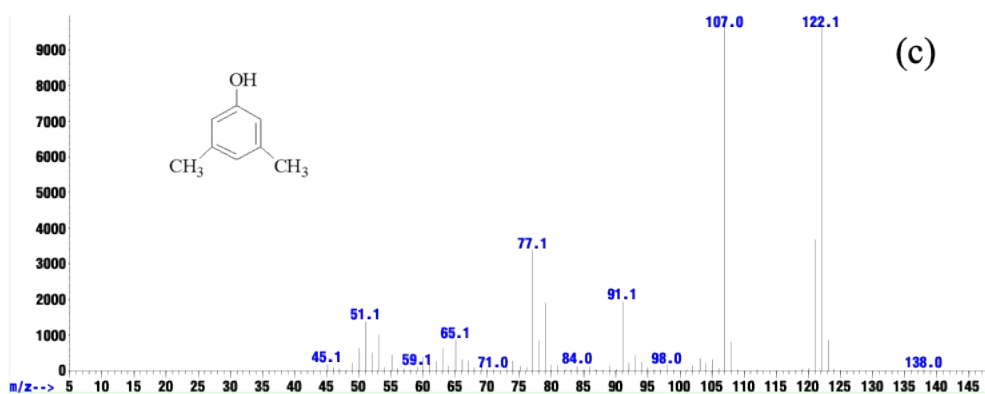

Fig. S5 Mass spectrograms of (a) 2,6-dimethylhydroquinone, (b) 2,6-dimethylbenzoquinone and (c) 3,5-dimethylphenol were Analyzed by GC-MS.

Tab. S1. Main water quality parameters of the secondary effluent

| Parameters                     | Units      |      |
|--------------------------------|------------|------|
| COD <sub>Cr</sub>              | mg/L       | 62   |
| TOC                            | mg/L       | 4.8  |
| NH <sub>3</sub> -N             | mg/L       | 0.6  |
| Turbidity                      | NTU        | 1.9  |
| Conductivity                   | $\mu S/cm$ | 740  |
| TDS                            | mg/L       | 651  |
| pH                             | /          | 8.1  |
| Cl <sup>-</sup>                | mg/L       | 17   |
| CO <sub>3</sub> <sup>2-</sup>  | mg/L       | 1.47 |
| HCO <sub>3</sub> <sup>2-</sup> | mg/L       | 90   |

Tab. S2 Toxicity results for chloroxylenol and its by-products after NTP/O<sub>3</sub> treatment using ECOSAR

| Method                           | Compound                                                                            | Acute toxicity (mg/L)   |                            |                              | Chronic toxicity (ChV)<br>(mg/L) |         |       | Hazard<br>category |
|----------------------------------|-------------------------------------------------------------------------------------|-------------------------|----------------------------|------------------------------|----------------------------------|---------|-------|--------------------|
|                                  |                                                                                     | Fish(LC <sub>50</sub> ) | Daphnid(LC <sub>50</sub> ) | Algae(<br>EC <sub>50</sub> ) | Fish                             | Daphnid | Algae |                    |
|                                  |                                                                                     |                         |                            |                              |                                  |         |       |                    |
| PCMX                             |  | 2.94                    | 2.29                       | 0.271                        | 0.331                            | 0.305   | 0.076 | toxic              |
| 2,6-<br>dimethylhydroquin<br>one |  | 6.21                    | 46.3                       | 2.62                         | 3.36                             | 17.2    | 0.357 | toxic              |
| 2,6-<br>dimethylbenzoqui<br>none |  | 6.36                    | 3.63                       | 0.573                        | 0.671                            | 0.441   | 1.41  | toxic              |
| 3,5-<br>dimethylphenol           |  | 0.070                   | 0.371                      | 0.046                        | 0.0058                           | 1.43    | 0.011 | very<br>toxic      |

The predicted toxicity values are classified according to the system established by the Globally Harmonized System of Classification and Labeling of Chemicals (GHS) White boxes, not harmful:  $LC_{50}/EC_{50}/ChV > 100$ ; blue boxes, harmful:  $100 \geq LC_{50}/EC_{50}/ChV > 10$ ; green boxes, toxic:  $10 \geq LC_{50}/EC_{50}/ChV > 1$ ; yellow boxes, very toxic:  $LC_{50}/EC_{50}/ChV \leq 1$ .
